# Supplementary material for: Evaluation of Kdo-8-N 3 incorporation into lipopolysaccharides of various Escherichia coli strains
Source: Royal Society of Chemistry journal article supplement (doi:10.1039/d3cb00110e), 2023-01-01
Supplement: d3cb00110e2.xlsx [file d3cb00110e2.xlsx]

## Sheet: Fig 3. OD and std. dev. values
	LB + Kdo				LB + Kdo-8-N3				LB				M9 + Kdo				M9 + Kdo-8-N3				M9
Time (hh:mm)	Measurement 1	Measurement 2	Measurement 3	standard deviation	Measurement 1	Measurement 2	Measurement 3	standard deviation	Measurement 1	Measurement 2	Measurement 3	standard deviation	Measurement 1	Measurement 2	Measurement 3	standard deviation	Measurement 1	Measurement 2	Measurement 3	standard deviation	Measurement 1	Measurement 2	Measurement 3	standard deviation
0:04:10	0.14	0.137	0.149	0.006245	0.139	0.135	0.134	0.00264575	0.15	0.146	0.131	0.0100167	0.144	0.136	0.131	0.00655744	0.155	0.13	0.149	0.0130512	0.155	0.152	0.137	0.00964365
1:04:10	0.152	0.151	0.158	0.00378594	0.143	0.14	0.229	0.0505404	0.163	0.161	0.153	0.0052915	0.154	0.147	0.145	0.00472582	0.205	0.135	0.221	0.0457384	0.18	0.171	0.188	0.0085049
2:04:10	0.191	0.187	0.198	0.00556776	0.189	0.179	0.238	0.0315753	0.188	0.185	0.172	0.0085049	0.164	0.152	0.152	0.0069282	0.231	0.149	0.201	0.041489	0.162	0.155	0.158	0.00351188
3:04:10	0.385	0.378	0.389	0.00556776	0.36	0.353	0.42	0.0368284	0.34	0.337	0.318	0.0119304	0.195	0.181	0.183	0.00757188	0.273	0.17	0.26	0.0560922	0.161	0.161	0.166	0.00288675
4:04:10	0.559	0.557	0.562	0.00251661	0.542	0.542	0.636	0.0542709	0.51	0.523	0.503	0.0101489	0.234	0.219	0.218	0.00896289	0.306	0.2	0.305	0.0609125	0.185	0.182	0.194	0.006245
5:04:10	0.616	0.615	0.62	0.00264575	0.636	0.635	0.735	0.0574485	0.578	0.598	0.585	0.0101489	0.263	0.256	0.248	0.00750555	0.337	0.228	0.333	0.0618088	0.207	0.204	0.217	0.00680686
6:04:10	0.655	0.653	0.662	0.00472582	0.643	0.638	0.741	0.0580775	0.604	0.626	0.611	0.0112398	0.309	0.301	0.296	0.00655744	0.388	0.275	0.379	0.0628039	0.232	0.229	0.243	0.00737111
7:04:10	0.679	0.678	0.688	0.00550757	0.652	0.644	0.742	0.0544181	0.631	0.647	0.644	0.0085049	0.344	0.338	0.333	0.00550757	0.445	0.328	0.434	0.0646091	0.264	0.263	0.277	0.00781025
8:04:10	0.675	0.671	0.683	0.0061101	0.658	0.644	0.74	0.0518588	0.639	0.66	0.648	0.0105357	0.37	0.364	0.361	0.00458258	0.472	0.356	0.459	0.0635531	0.3	0.298	0.313	0.00814453
9:04:10	0.668	0.669	0.679	0.00608276	0.657	0.645	0.735	0.0488672	0.629	0.648	0.64	0.00953939	0.4	0.389	0.384	0.00818535	0.502	0.379	0.495	0.0690821	0.322	0.322	0.34	0.0103923
10:04:10	0.668	0.674	0.68	0.006	0.657	0.649	0.734	0.0469361	0.625	0.644	0.641	0.0102144	0.427	0.414	0.411	0.0085049	0.559	0.4	0.559	0.0917987	0.336	0.336	0.353	0.00981495
11:04:10	0.673	0.674	0.682	0.00493288	0.659	0.654	0.736	0.0459674	0.628	0.648	0.642	0.0102632	0.447	0.437	0.431	0.0080829	0.608	0.414	0.605	0.11115	0.346	0.346	0.365	0.0109697
12:04:10	0.686	0.686	0.693	0.00404145	0.664	0.661	0.741	0.0453468	0.628	0.65	0.642	0.0111355	0.467	0.456	0.447	0.0100167	0.651	0.43	0.632	0.122479	0.357	0.356	0.375	0.0106927
13:04:10	0.694	0.696	0.704	0.0052915	0.672	0.669	0.747	0.0441928	0.626	0.652	0.647	0.0137961	0.475	0.461	0.462	0.00781025	0.678	0.437	0.639	0.129361	0.366	0.367	0.385	0.0106927
14:04:10	0.706	0.706	0.714	0.0046188	0.679	0.678	0.753	0.0430155	0.63	0.655	0.645	0.0125831	0.47	0.458	0.46	0.0064291	0.684	0.444	0.64	0.127771	0.376	0.377	0.395	0.0106927
15:04:10	0.713	0.713	0.723	0.0057735	0.685	0.684	0.756	0.0412836	0.634	0.659	0.65	0.0126623	0.47	0.453	0.448	0.0115326	0.688	0.445	0.633	0.127422	0.385	0.386	0.403	0.010116
16:04:10	0.722	0.721	0.731	0.00550757	0.692	0.689	0.762	0.0413078	0.639	0.663	0.656	0.0123423	0.466	0.451	0.445	0.0108167	0.689	0.453	0.628	0.122503	0.395	0.397	0.408	0.007
17:04:10	0.73	0.728	0.738	0.0052915	0.697	0.696	0.776	0.0459021	0.644	0.666	0.661	0.0115326	0.466	0.451	0.445	0.0108167	0.691	0.455	0.626	0.121903	0.402	0.406	0.408	0.00305505
18:04:10	0.735	0.738	0.747	0.006245	0.702	0.701	0.785	0.0482113	0.649	0.674	0.668	0.0130512	0.47	0.454	0.447	0.0117898	0.691	0.463	0.626	0.117458	0.404	0.409	0.408	0.00264575
19:04:10	0.744	0.745	0.756	0.00665833	0.708	0.706	0.79	0.0479305	0.656	0.679	0.675	0.0122882	0.473	0.457	0.449	0.0122202	0.692	0.468	0.628	0.115378	0.406	0.413	0.41	0.00351188
20:04:10	0.754	0.752	0.764	0.0064291	0.712	0.711	0.793	0.0470567	0.661	0.686	0.682	0.0134288	0.476	0.46	0.451	0.0126623	0.693	0.473	0.632	0.11358	0.412	0.416	0.411	0.00264575
21:04:10	0.762	0.76	0.771	0.00585947	0.718	0.715	0.793	0.0441928	0.667	0.693	0.689	0.014	0.478	0.465	0.454	0.0120139	0.696	0.48	0.636	0.111499	0.417	0.42	0.415	0.00251661
22:04:10	0.768	0.767	0.778	0.00608276	0.724	0.721	0.792	0.0401539	0.674	0.7	0.695	0.0137961	0.482	0.47	0.457	0.0125033	0.705	0.487	0.641	0.112054	0.422	0.427	0.418	0.00450925
23:04:10	0.773	0.774	0.783	0.00550757	0.725	0.726	0.789	0.0366652	0.68	0.705	0.701	0.0134288	0.488	0.476	0.462	0.0130128	0.707	0.493	0.646	0.110247	0.427	0.433	0.421	0.006
1 day, 0:04:10	0.778	0.778	0.788	0.0057735	0.727	0.729	0.786	0.0335012	0.687	0.71	0.705	0.0120968	0.494	0.482	0.467	0.0135277	0.703	0.5	0.651	0.105447	0.431	0.439	0.424	0.00750555
